# Supplementary material for: Fluoral-p infiltrated SiO2 inverse opal photonic crystals as fluorescent film sensors for detecting formaldehyde vapor
Source: Royal Society of Chemistry journal article supplement (doi:10.1039/c6tc03862j), 2016-01-01
Supplement: c6tc03862j1.pdf [file c6tc03862j1.pdf]

## Electronic Supplementary Information

### Fluoral-p infiltrated SiO<sub>2</sub> inverse opal photonic crystals as fluorescent film sensors for detecting formaldehyde vapor

Yuqi Zhang,<sup>a</sup> Lidan Mu,<sup>a</sup> Ru Zhou,<sup>a</sup> Pei Li,<sup>b</sup> Jiaqi Liu,<sup>a</sup> Loujun Gao,<sup>a</sup> Liping Heng<sup>\*b</sup> and Lei Jiang<sup>b</sup>

<sup>a</sup> College of Chemistry & Chemical Engineering, Shaanxi Key Laboratory of Chemical Reaction Engineering, Yan'an University, Yan'an, Shaanxi 716000, P. R. China.

<sup>b</sup> School of Chemistry and Environment, Beihang University, 100191, P. R. China.

\*E-mail: henglp@iccas.ac.cn Fax: (+86) 10-82627566

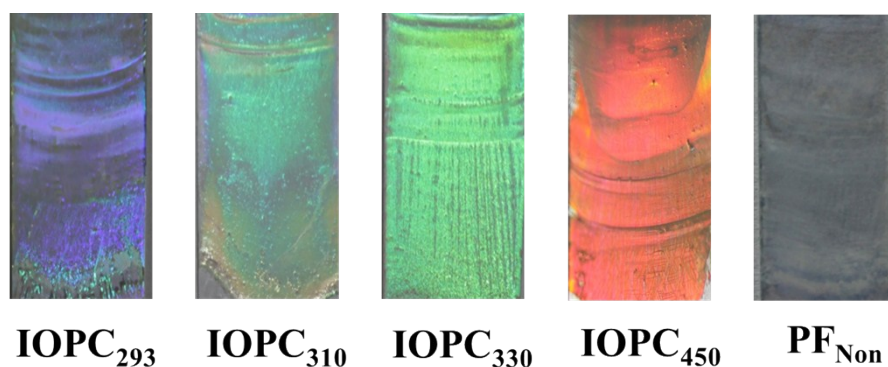

Fig. S1 Photographs of SiO<sub>2</sub> inverse opals IOPC<sub>293</sub>, IOPC<sub>310</sub>, IOPC<sub>330</sub>, IOPC<sub>450</sub>, and the non-periodic SiO<sub>2</sub> porous film PF<sub>Non</sub>. The photos were obtained from a digital camera (Canon 600D).

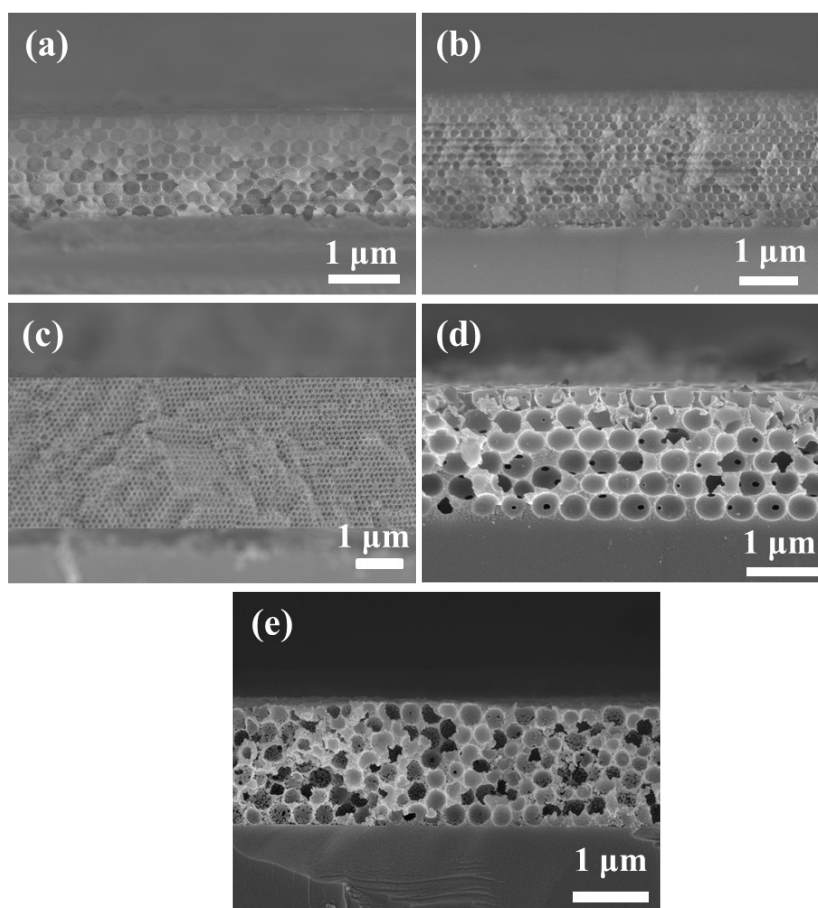

Fig. S2 The cross-sectional SEM images of SiO<sub>2</sub> IOPC<sub>293</sub> (a), IOPC<sub>310</sub> (b), IOPC<sub>330</sub> (c), IOPC<sub>450</sub> (d), and non-periodic SiO<sub>2</sub> porous film (e).

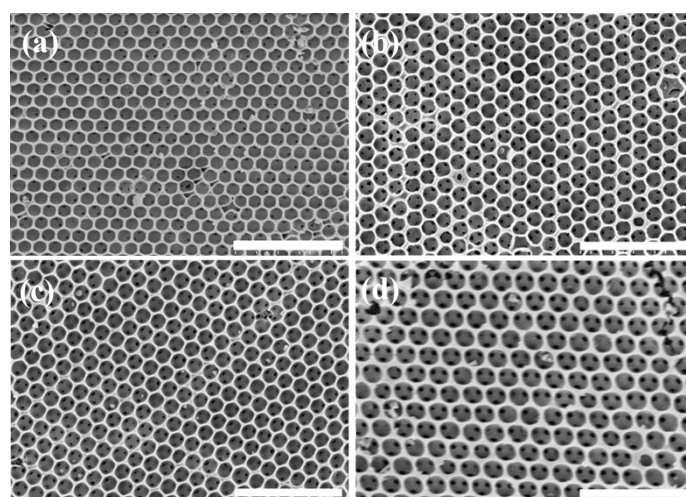

**Fig. S3** SEM images of Fluoral-p infiltrated SiO<sub>2</sub> IOPC films fabricated from PS microspheres with diameters of (a) 293, (b) 310, (c) 330, (d) 450 nm, respectively.

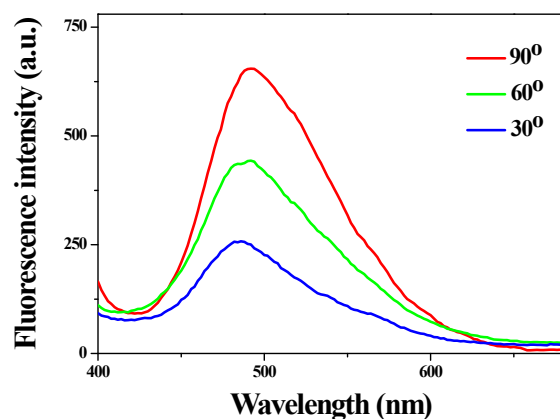

**Fig. S4** The in situ fluorescence spectra of F-SiO<sub>2</sub> IOPC<sub>330</sub> recorded at different angle between the incident light and (111) plane of PCs when the concentration of formaldehyde vapor is 12.8 mg/m<sup>3</sup>.

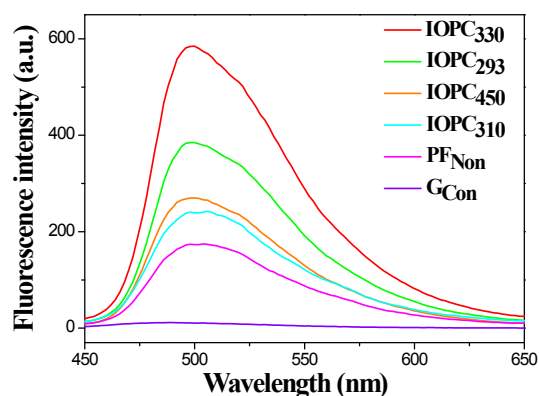

**Fig. S5** The fluorescence spectra of different F-SiO<sub>2</sub> IOPC sensors, the non-periodic SiO<sub>2</sub> porous film (PF<sub>Non</sub>) and the control sample (G<sub>con</sub>) exposed to FA vapor for 320 s at the concentration of 12.8 mg/m<sup>3</sup> ( $\lambda_{\text{ex}} = 360$  nm).

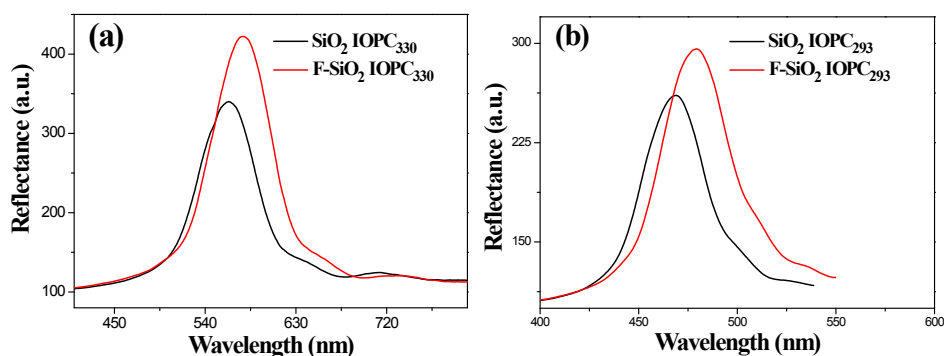

**Fig. S6** The reflectance spectra of  $\text{SiO}_2$  IOPC<sub>330</sub> (a) and  $\text{SiO}_2$  IOPC<sub>293</sub> (b) before (black line) and after (red line) infiltrating Fluoral-p molecules. There is a little shift in the reflectance spectra after Fluoral-p molecules infiltrated into the  $\text{SiO}_2$  IOPC because small quantities of Fluoral-p may induce tiny variation in the effective refractive index of PC. Red shifts of 14 nm and 10 nm in the stopband for  $\text{SiO}_2$  IOPC<sub>330</sub> and  $\text{SiO}_2$  IOPC<sub>293</sub> can be observed.

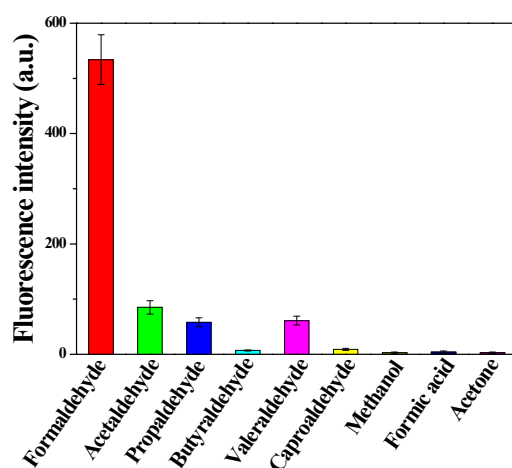

**Fig. S7** The fluorescence intensity at the wavelength of  $\sim 495$  nm when the  $\text{F-SiO}_2$  IOPC<sub>330</sub> sensor was exposed to the different aldehydes and other volatile organic compounds (VOCs) at concentration of  $12.8 \text{ mg/m}^3$ . There is remarkably strong fluorescence in the environment of formaldehyde vapor, while there are very weak or even no fluorescence in the vapors of other aldehydes and VOCs, which demonstrated that the as-prepared sensor is excellently selective to formaldehyde.
